# Supplementary material for: SARS-CoV-2 antibody dynamics in blood donors and COVID-19 epidemiology in eight Brazilian state capitals: A serial cross-sectional study
Source: eLife journal article supplement (doi:10.7554/elife.78233), 2022-09-20
Supplement: supp [file elife-78233-supp-v1.zip]

Archive with 6 entries (6 files):
- elife_poa_e78233_Figure_2_figure_supplement_1.jpg
- elife_poa_e78233_Figure_2_figure_supplement_2.pdf
- elife_poa_e78233_Figure_4_ffigure_supplement_1.pdf
- elife_poa_e78233_Figure_5_figure_supplement_1.pdf
- elife_poa_e78233_Supplementary_file_1.docx
- elife_poa_e78233_Supplementary_file_2.docx
