# Supplementary material for: SARS-CoV-2 antibody dynamics in blood donors and COVID-19 epidemiology in eight Brazilian state capitals: A serial cross-sectional study
Source: eLife journal article supplement (doi:10.7554/elife.78233), 2022-09-20

Period from March 2020 to  
December 2020  
(not dominated by Gamma)

Period from December 2020  
to March 2021  
(dominated by Gamma)

Upper bound for the period from  
December 2020 to March 2021  
(dominated by Gamma)

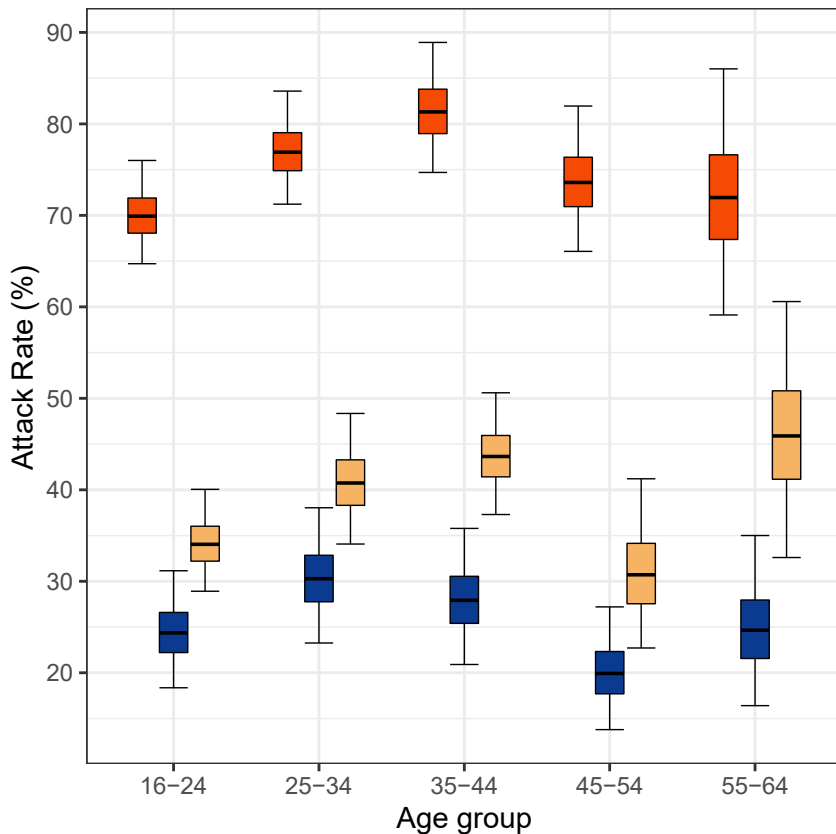

Supplement: supp [file elife-78233-supp-v1.zip › elife_poa_e78233_Figure_5_figure_supplement_1.pdf]
