# Supplementary figures and images for: SARS-CoV-2 antibody dynamics in blood donors and COVID-19 epidemiology in eight Brazilian state capitals: A serial cross-sectional study
Source: eLife journal article supplement (doi:10.7554/elife.78233), 2022-09-20

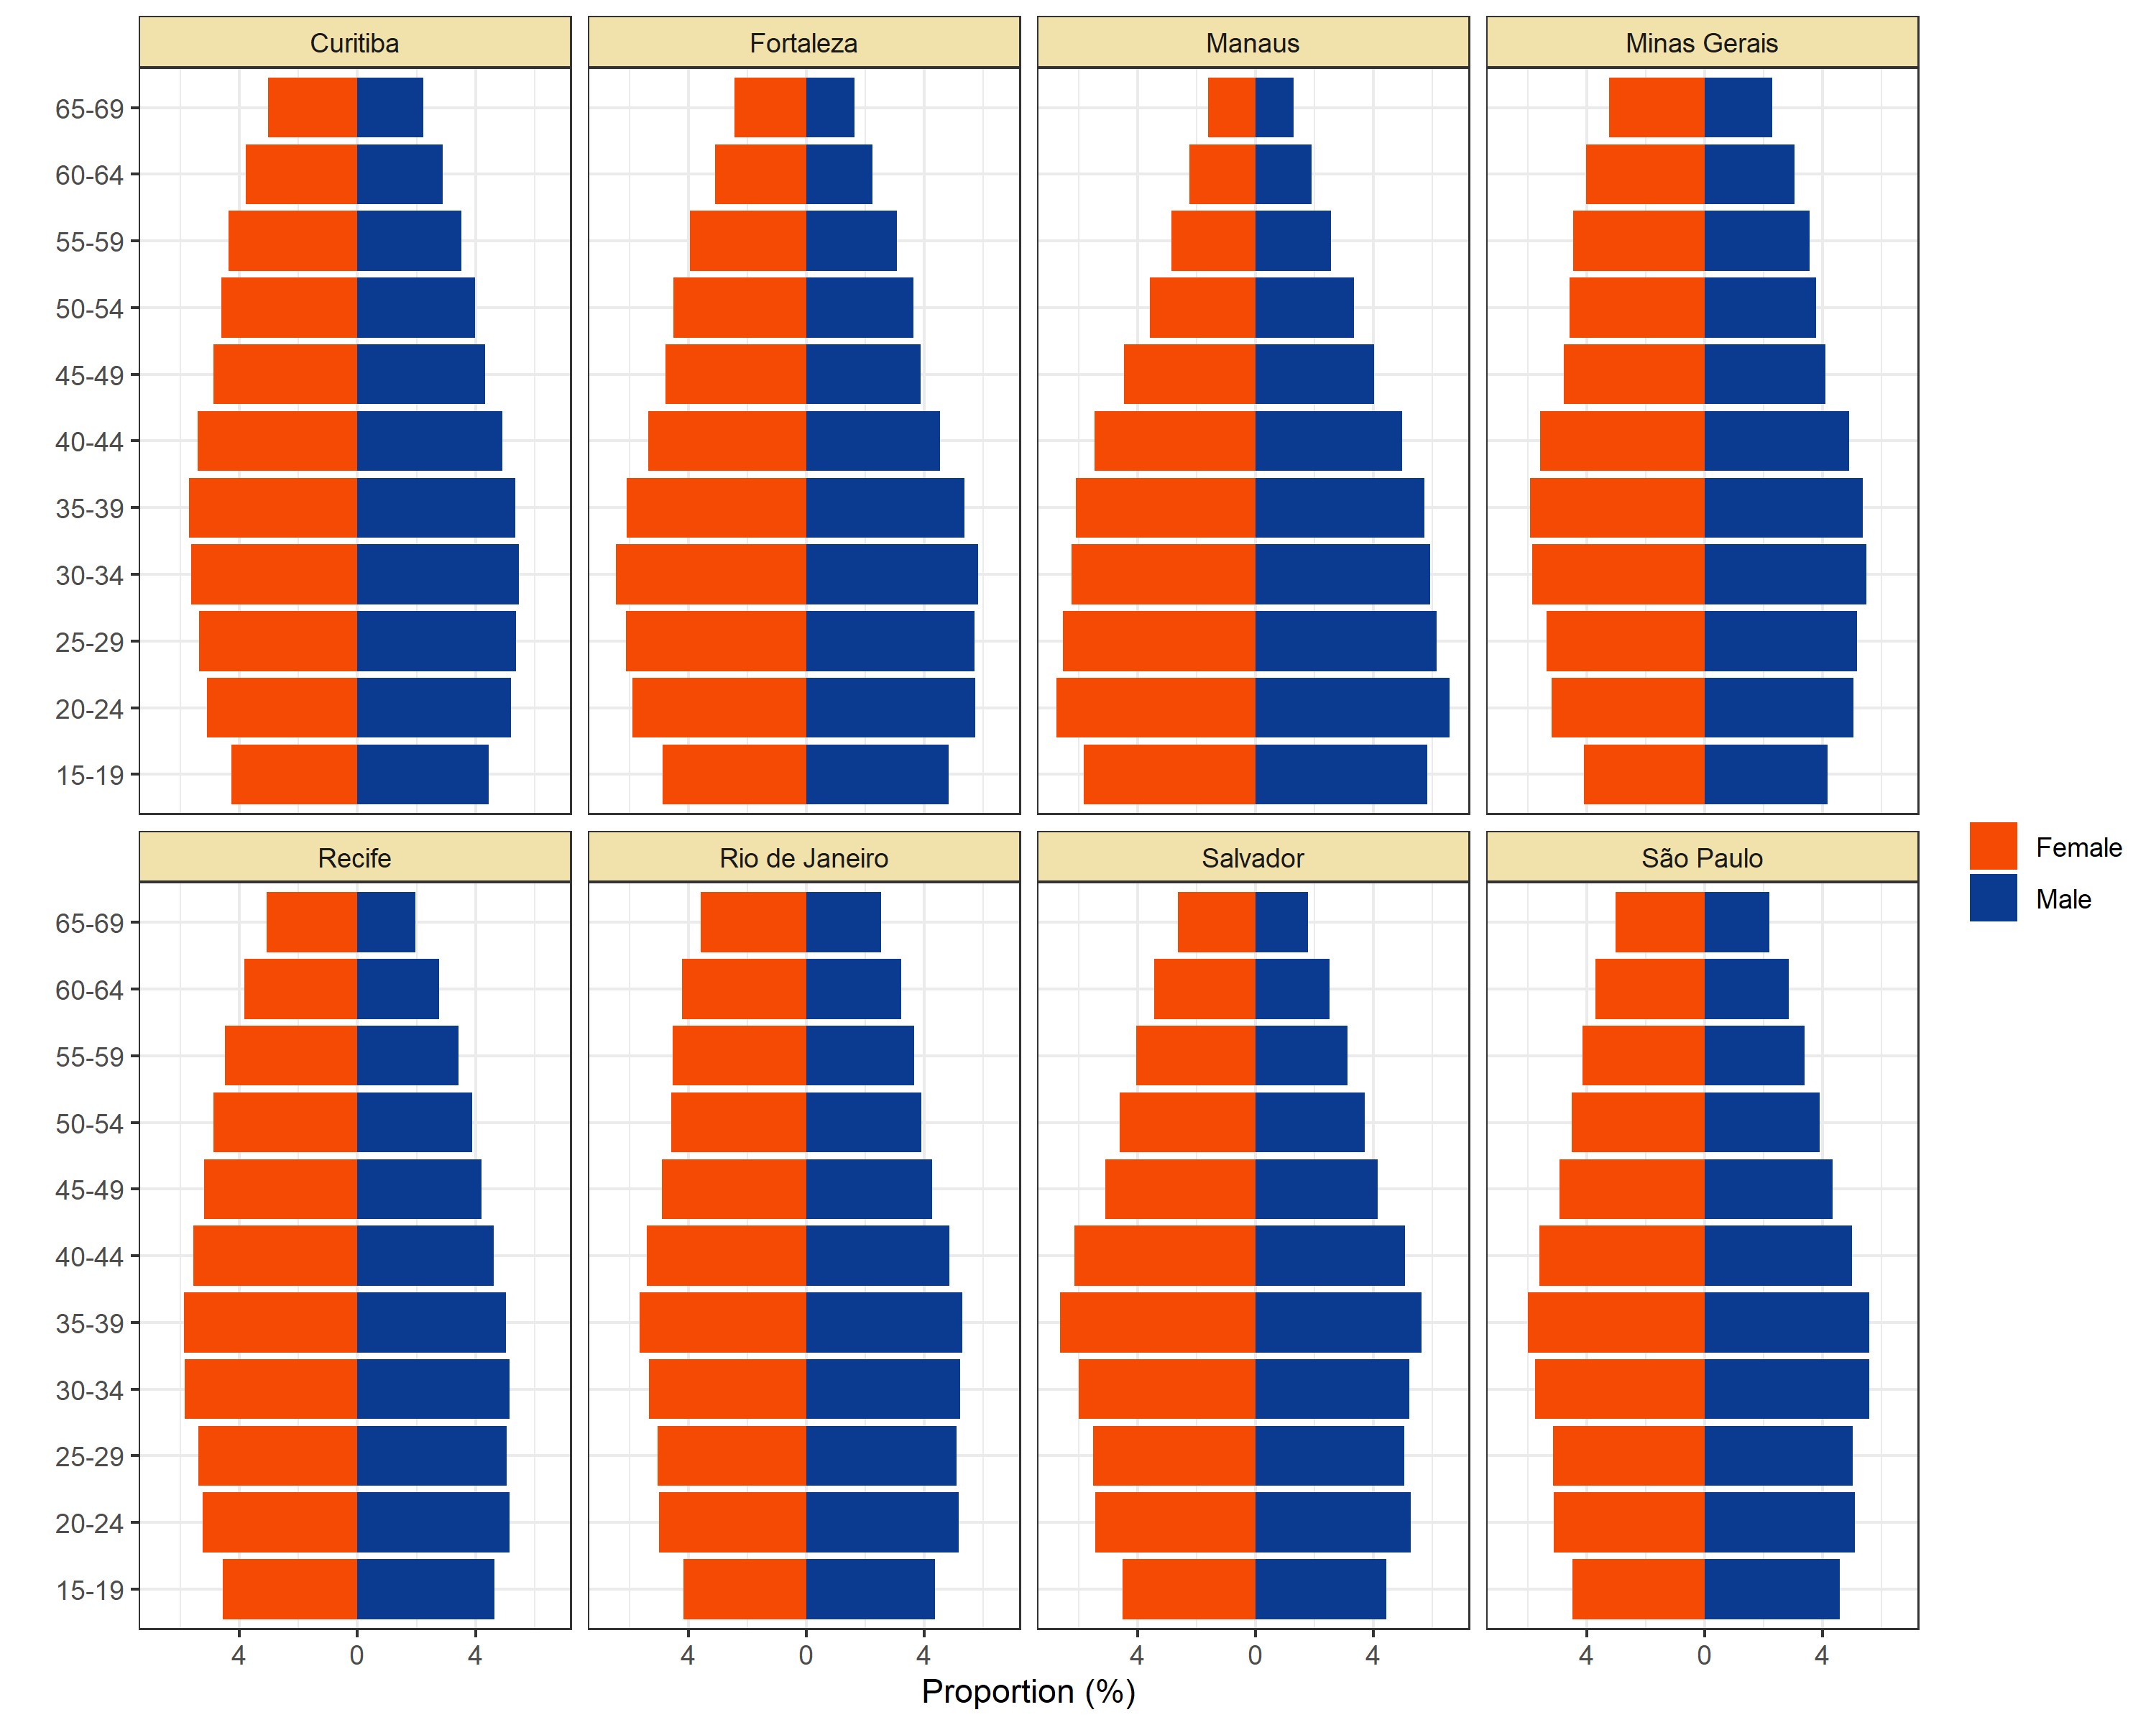

Supplement: supp [file elife-78233-supp-v1.zip › elife_poa_e78233_Figure_2_figure_supplement_1.jpg]

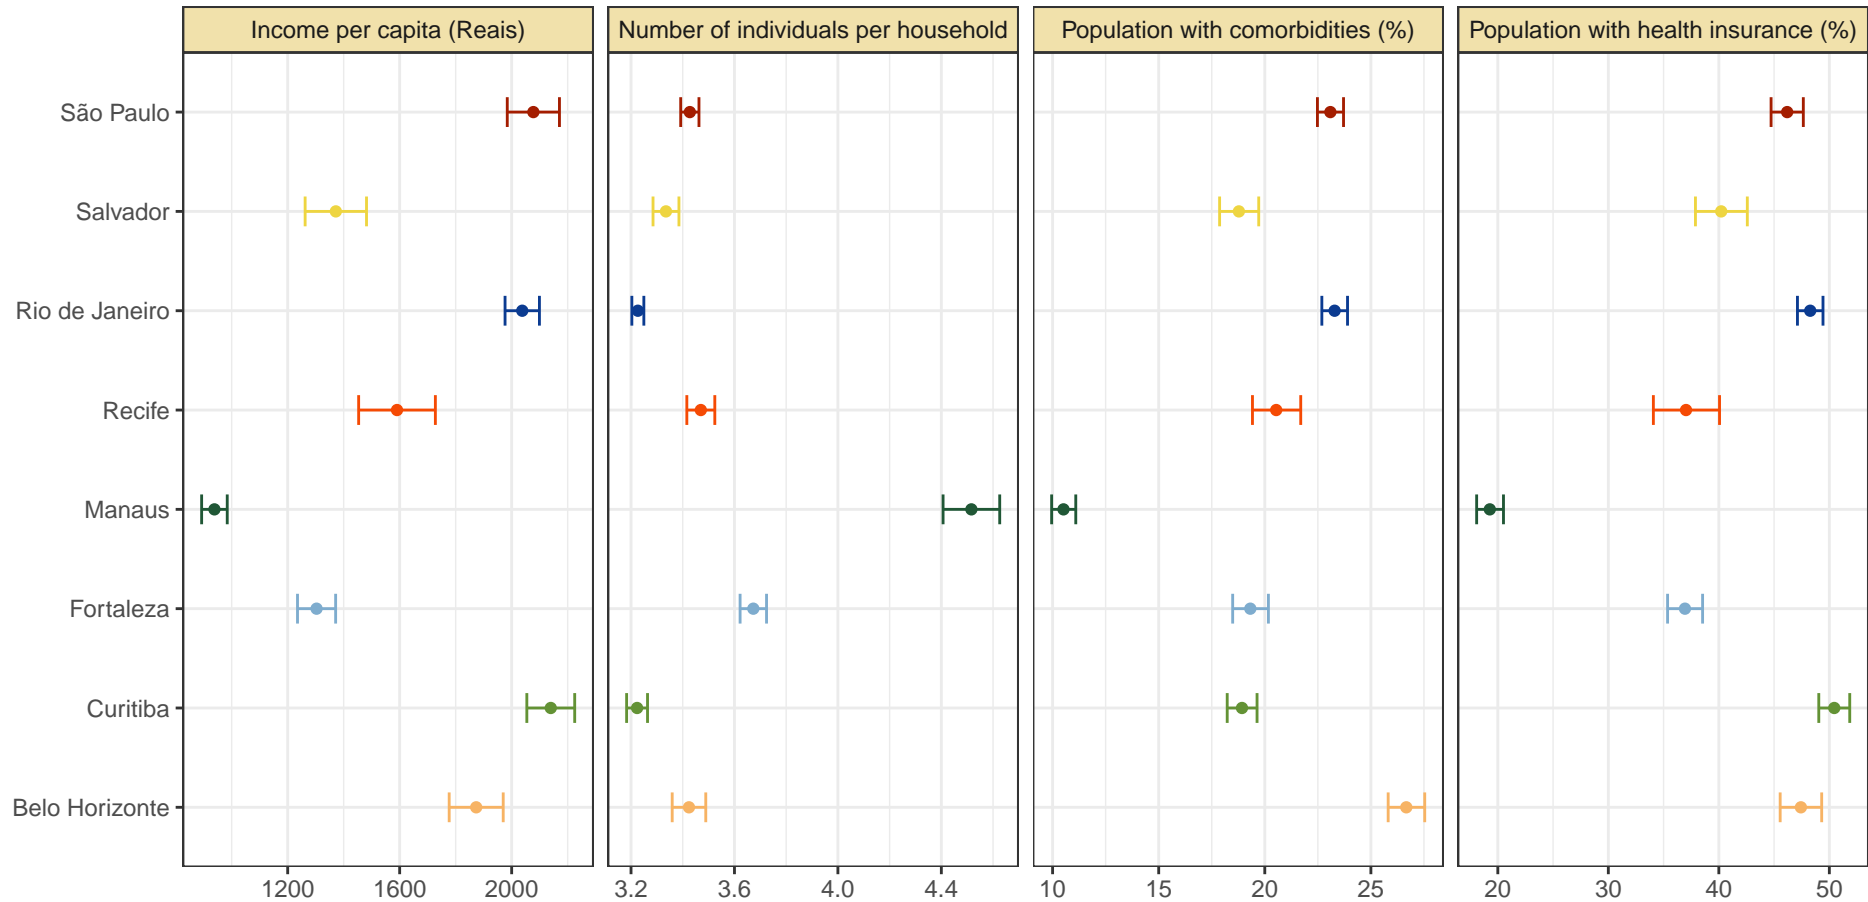

Supplement: supp [file elife-78233-supp-v1.zip › elife_poa_e78233_Figure_2_figure_supplement_2.pdf]

Belo Horizonte
  Curitiba
  Fortaleza
  Manaus
  Recife
  Rio de Janeiro
  Salvador
  São Paulo

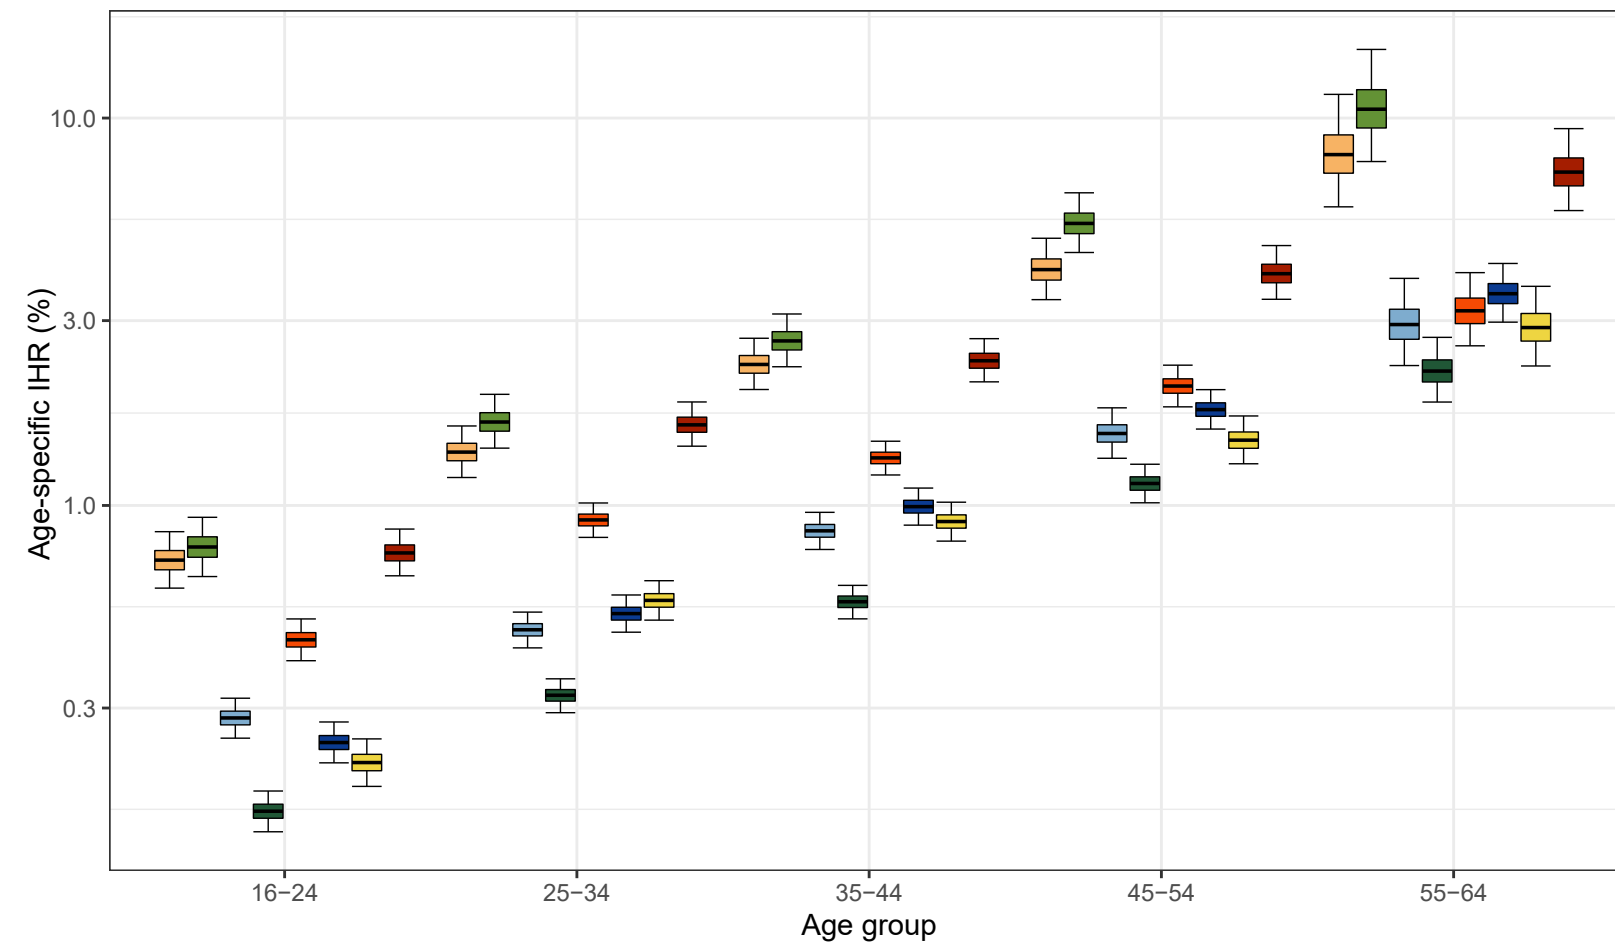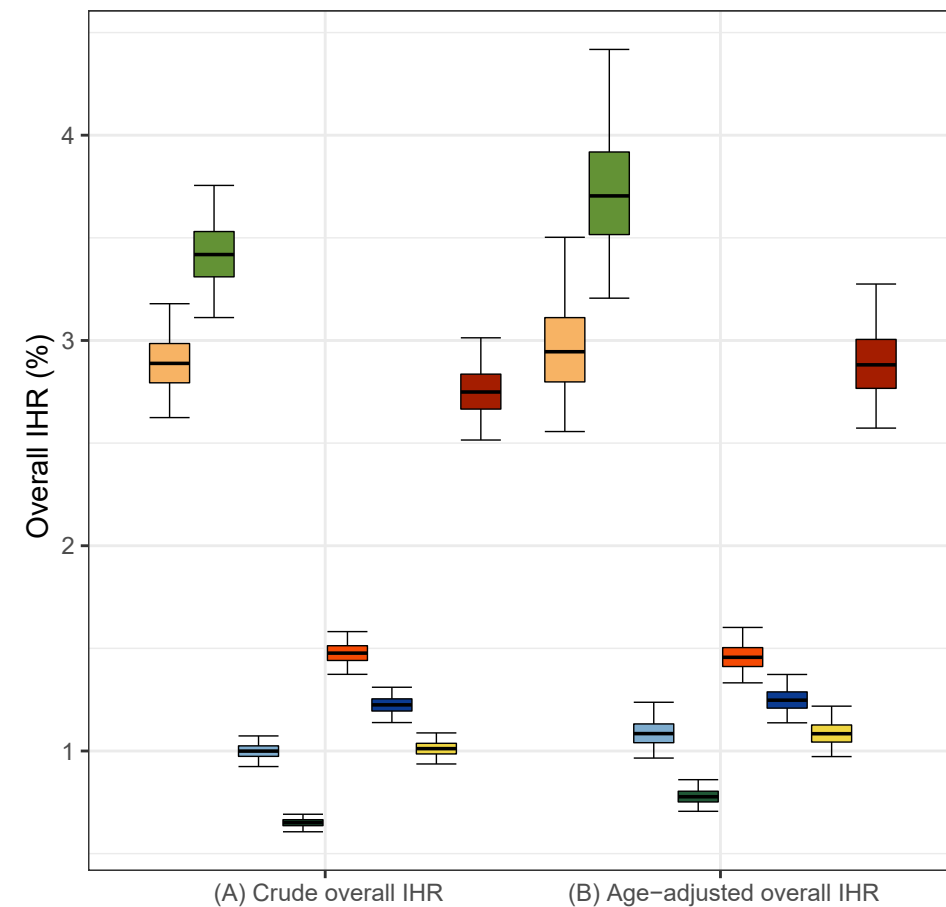

Supplement: supp [file elife-78233-supp-v1.zip › elife_poa_e78233_Figure_4_ffigure_supplement_1.pdf]
